# Supplementary material for: Effectiveness of Multistrain Probiotic Formulation on Common Infectious Disease Symptoms and Gut Microbiota Modulation in Flu‐Vaccinated Healthy Elderly Subjects
Source: Hindawi journal article supplement (doi:10.1155/2022/3860896), 2022-01-01

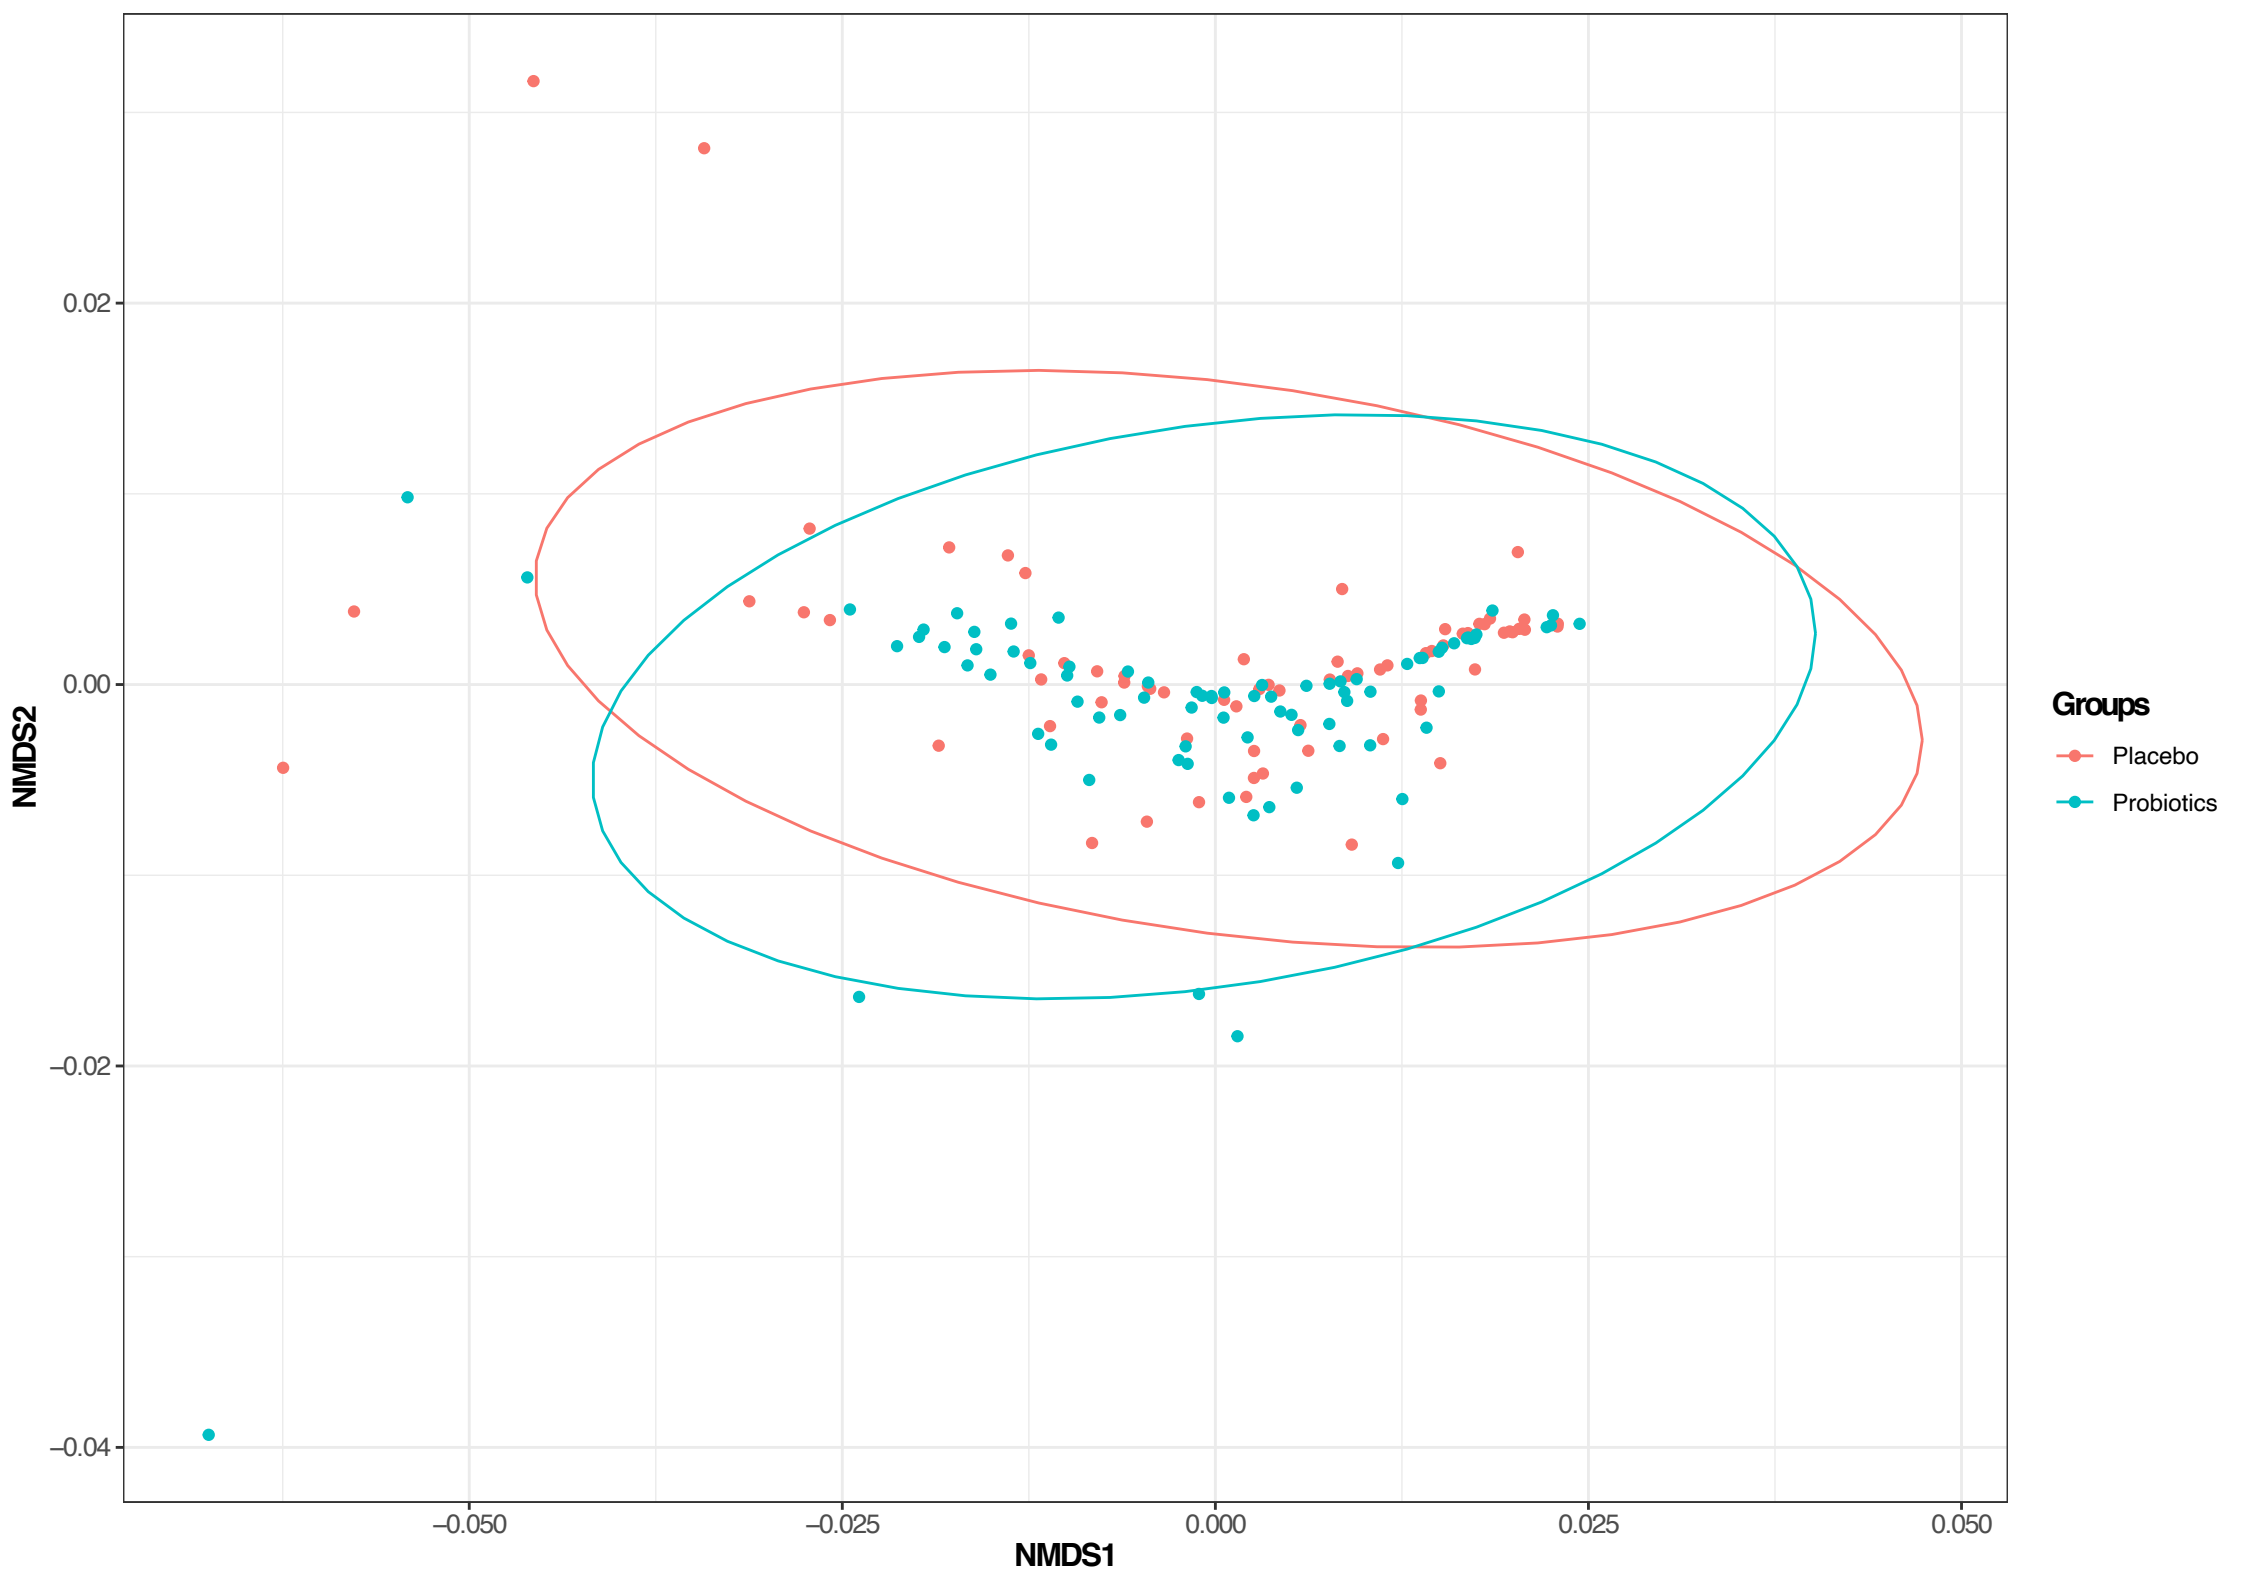

Supplement: f1 [file 3860896.f1.pdf]
